# Supplementary material for: Design of a new synthetic nanocatalyst resulting high fuel quality based on multiple supports: experimental investigation and modeling
Source: publisher site journal article supplement (doi:10.1515/cppm-2021-0073), 2022-04-14
Supplement: Supplementary file 1 [file j_cppm-2021-0073_suppl_001.pdf]

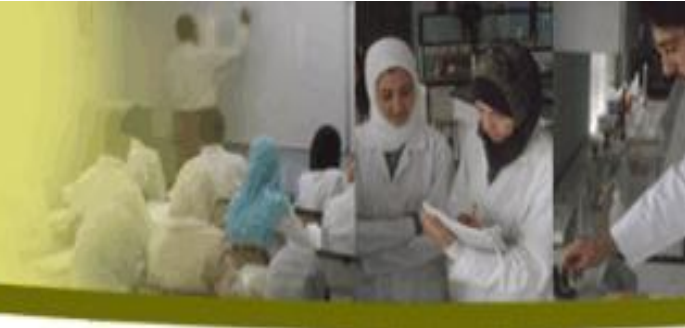

*Prof. Dr. Aysar Talib Jarullah (Ph.D, UK)*  
*Reactors Design, Petroleum Refining, Kinetic Models*

*Chemical Engineering Department*  
*College of Engineering – Tikrit University, P.O. Box (42)*  
*Tikrit – Salahuddin – IRAQ*  
*Tel: +964(0)7706688809*  
*Email: A.T.Jaruulah@tu.edu.iq*

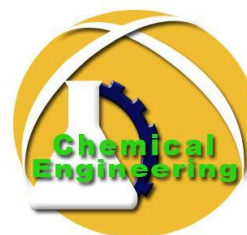

Tikrit University  
College of Engineering

<https://scholar.google.co.uk/citations?user=BQW6ojcAAAAJ&hl=en>  
[https://www.researchgate.net/profile/Aysar\\_Jarullah2](https://www.researchgate.net/profile/Aysar_Jarullah2)

**06 March 2022**

Dear Sir/Madam,

We are pleased to submit the revised version of the following paper to your journal:

***Design of a new synthetic nanocatalyst resulting high fuel  
quality based on multiple supports: experimental investigation  
and modeling***

We have addressed all the comments by the reviewers to the best of our ability and also changed the title of the paper.

Hope you will be able to consider the paper for your journal.

Thank you.

Kind regards,

***Prof. Dr. Aysar Talib Jarullah***
